# Supplementary material for: Machine learning-guided protein engineering to improve the catalytic activity of transaminases under neutral pH conditions
Source: Royal Society of Chemistry journal article supplement (doi:10.1039/d5qo00423c), 2025-01-01
Supplement: d5qo00423c2.xlsx [file d5qo00423c2.xlsx]

## Sheet: all data
entry	variants	the key residues											the specific activities of different substrates (mU/mg) (errors were shown in the table below)
													1a						1b						1c						1d						1e						1f
		19	58	59	87	152	165	167	168	231	261	420	pH = 9.0	pH = 8.5	pH = 8.0	pH = 7.5	pH = 7.0	pH = 6.5	pH = 9.0	pH = 8.5	pH = 8.0	pH = 7.5	pH = 7.0	pH = 6.5	pH = 9.0	pH = 8.5	pH = 8.0	pH = 7.5	pH = 7.0	pH = 6.5	pH = 9.0	pH = 8.5	pH = 8.0	pH = 7.5	pH = 7.0	pH = 6.5	pH = 9.0	pH = 8.5	pH = 8.0	pH = 7.5	pH = 7.0	pH = 6.5	pH = 9.0	pH = 8.5	pH = 8.0	pH = 7.5	pH = 7.0	pH = 6.5
1	3FCR-3M	S	L	W	F	Y	L	L	F	A	V	R	10392.1	6503.59	8220.23	1653.44	767.52	312.262	12779	10047.2	11958.3	2475.18	1120.44	427.991	4096.52	12432.9	16149.7	8348.49	3888.32	1684.23	4424.83	4764.97	3931.96	1960.12	1272.08	662.676	14780.5	13996.1	7378.87	1801.88	821.117	329.803	14296.9	13013.6	14610.7	3777.96	1588.24	654.035
2	3FCR-3M-S19I	I	L	W	F	Y	L	L	F	A	V	R	1220.05	689.153	524.466	427.898	149.664	38.9603	10382.5	8904.56	832.297	1047.02	492.744	168.449	4220.34	12262.4	19926	2741.11	1532.43	679.969	2131.99	1720.88	1478.81	1015.84	523.855	228.759	1737.21	1504.94	1255.62	518.102	189.613	59.8641	12505.5	7533.73	6122.13	1890.14	957.682	347.422
3	3FCR-3M-S19H	H	L	W	F	Y	L	L	F	A	V	R	1136.3	615.607	489.58	438.641	147.257	48.9943	994.035	700.749	564.7	444.258	166.901	54.4771	23209.8	24931.2	10995.9	1686.18	909.183	484.319	1584.29	1321.91	1111.8	799.175	411.24	191.001	1415.51	1211.99	979.75	463.021	212.76	67.7179	9793.23	9059.27	7394.98	983.171	527.037	215.024
4	3FCR-3M-L58M	S	M	W	F	Y	L	L	F	A	V	R	5402.16	6331.05	4695.43	4368.53	1088.63	168.3	5531.88	5892.9	4830.46	3402.78	1950.47	153.461	4135.48	5745.23	8118.99	4955.09	3973.45	1645.53	5670.98	15168.5	7323.87	7059.14	2646.01	2176.7	6268.36	3567.62	4785.79	1757.36	625.924	598.902	3392.6	3968.94	6582.34	3907.94	1726.54	847.495
5	3FCR-3M-L58I	S	I	W	F	Y	L	L	F	A	V	R	2365.16	1883.74	828.827	432.457	154.899	59.378	1821.2	693.548	226.885	182.37	74.2887	15.6768	14034.4	14162.2	19592.7	12014.8	8404.72	614.419	2835.28	3088.37	1126.27	603.89	392.791	216.625	4516.62	3879.01	1032.53	592.004	287.116	106.015	14116	11369.7	4414.82	1285.9	585.042	321.218
6	3FCR-3M-L58K	S	K	W	F	Y	L	L	F	A	V	R	5	8.18956	9.90753	24.2563	10.8722	14.4799	17.8887	17.5085	10.1642	20.3803	12.6576	11.7217	86.5466	75.5296	17.8422	57.2113	44.9813	31.2221	83.7504	67.4615	43.1695	27.2612	18.2932	6.42052	64.506	36.5379	25.294	7.93996	6.28612	5	76.0812	64.4988	48.2195	38.0526	19.7495	17.8061
7	3FCR-3M-W59L	S	L	L	F	Y	L	L	F	A	V	R	7956.24	3347.69	6390.62	1808.77	444.355	251.68	4256.21	3108.35	3624.93	1367.67	273.912	144.179	5801.49	5904.96	6774.62	5720.94	5163.83	290.453	1139.36	2209.31	2833.77	1764.69	426.369	283.562	7900.83	7574.97	6534.12	4108.79	89.6426	700.174	6554.13	5764.47	6513.9	3197.21	1079.47	548.792
8	3FCR-3M-W59C	S	L	C	F	Y	L	L	F	A	V	R	4970.66	2896.76	6493.43	3987.44	2666.56	2301.32	5919.16	3927.4	4570.78	1341.18	1033.85	334.422	6202.4	6446.94	7818.52	3886.66	4238.09	1977.88	2915.09	4521.96	3117.81	3126.06	4073.47	1543.81	6497.11	5857.13	5141.6	4093.46	2719.25	1634.92	7019.07	5310.88	6396.45	3406.42	2059.11	715.151
9	3FCR-3M-W59F	S	L	F	F	Y	L	L	F	A	V	R	7340.03	8032.82	4797.12	944.262	480.639	204.426	3964.78	3310.97	2113.57	370.514	186.15	83.801	13044.5	12830.9	8677.76	7061.28	1052.39	582.251	8749.99	7954.65	5095.04	930.852	611.246	389.396	7027.88	6635.42	4021.96	711.958	430.418	202.839	5488.84	4165.22	3553.81	545.572	288.641	128.007
10	3FCR-3M-W59Y	S	L	Y	F	Y	L	L	F	A	V	R	630.48	516.399	328.396	163.94	40.4226	8.1013	365.594	252.829	170.219	77.4934	22.9821	6.63685	7182.74	4195.3	897.201	587.288	270.722	107.63	1577.48	1240.28	1026.31	682.987	336.435	139.119	576.108	447.943	288.408	121.433	39.9626	8.45111	797.442	618.84	430.012	199.664	69.4953	25.1947
11	3FCR-3M-F87Y	S	L	W	Y	Y	L	L	F	A	V	R	10212.4	10459.9	11062.7	1739.73	640.893	262.618	1346.53	1258.98	553.195	386.634	136.462	25.626	25787.8	37820.2	24557.1	26400.7	21000.4	6124	7205.7	16245.4	15428	7851.7	1409.06	690.692	17261.4	10691.2	4204.81	1742.35	946.066	422.603	30681.3	13775.6	24634.3	5513.86	1895.74	833.718
12	3FCR-3M-Y152N	S	L	W	F	N	L	L	F	A	V	R	901.487	811.128	666.109	412.396	138.926	42.4396	900.623	771.59	694.216	414.424	145.886	38.6178	1224.71	1116.16	1151.73	1041.72	720.11	390.22	1036.33	1020.46	937.736	917.986	577.777	278.055	1099.4	994.028	934.76	619.167	280.453	86.2703	1429.06	1257.52	1154.08	883.015	479.399	200.618
13	3FCR-3M-Y152F	S	L	W	F	F	L	L	F	A	V	R	3456.52	4086.3	1031.11	512.904	139.41	44.7549	3907.55	5087.55	2964.67	542.547	209.615	76.6336	10576.5	9810.66	10737.4	5935.52	4363.88	494.631	7650.2	5442.03	5809.02	912.568	529.704	258.579	5806.56	4907.22	4777.1	622.246	281.542	94.3858	8668.74	8390.24	6222.17	930.287	465.711	215.209
14	3FCR-3M-Y152H	S	L	W	F	H	L	L	F	A	V	R	1178.8	1074.91	978.07	533.618	147.466	54.7228	896.016	833.281	630.3	368.523	138.745	41.9404	5589.64	5247.16	5196.32	1575.58	881.951	494.83	1407.62	1254.55	1273.55	923.998	571.591	240.187	1351.57	1209.61	1057.14	631.507	268.879	95.9897	1739.49	1629.21	1377.69	795.694	427.302	170.09
15	3FCR-3M-L165K	S	L	W	F	Y	K	L	F	A	V	R	13.6958	9.3601	12.3296	6.66586	5	5.74715	6.1987	5	8.88699	12.7508	5	5	19.8048	22.6977	14.9933	5	10.0729	17.019	110.8	102.442	5	41.0279	8.55321	10.2728	5	5	5	6.66722	9.56531	5	22.053	26.8287	26.0613	8.85134	11.3371	9.4969
16	3FCR-3M-L165E	S	L	W	F	Y	E	L	F	A	V	R	10.5086	6.31294	9.18145	19.4918	5	5	14.6466	28.3048	17.8368	34.6729	15.4583	5	14.8994	13.4845	5.43607	12.8069	13.2072	5	5	65.1996	6.9791	5	27.7731	12.7829	18.4415	8.32705	5	5	5	12.1764	6.93772	5	5	24.7359	6.78053	5
17	3FCR-3M-L167H	S	L	W	F	Y	L	H	F	A	V	R	2156.09	1951.69	1594.84	793.79	403.765	133.944	2431.9	2077	1604.4	990.547	413.64	163.462	5789.5	5416.2	10082.6	5029.63	2492.71	1333.73	3494.38	2843.83	2416.75	1592.38	1074.59	547.068	2965.95	2804.47	2508.11	1432.26	727.739	293.349	4392.48	3314.95	3081.82	1664.34	971.159	455.517
18	3FCR-3M-L167F	S	L	W	F	Y	L	F	F	A	V	R	1620.53	1410.84	1453.37	412.672	329.953	80.879	3788.08	2064.96	1208.24	1048.1	443.616	103.599	12534.9	10800.2	5811.66	2711.38	1613	843.709	2762.22	2792.44	1866.36	1217.57	641.287	310.141	1820.23	1558.29	1398.97	582.406	246.014	81.7502	6826.97	5585.83	3311.07	1408.16	716.634	319.792
19	3FCR-3M-L167Y	S	L	W	F	Y	L	Y	F	A	V	R	982.015	991.111	803.058	267.615	168.65	37.0249	1407.4	1693.81	1256.94	569.99	299.838	93.991	28307.5	2769.5	45269	12084.1	1426.17	750.549	3501.74	2781.91	2269.03	1151.6	704.33	338.337	2055.97	1829.9	1490.26	619.721	300.678	110.949	2764.93	2419.48	1751.97	956.615	554.111	209.946
20	3FCR-3M-F168H	S	L	W	F	Y	L	L	H	A	V	R	652.514	570.065	479.745	200.041	93.0835	30.2359	591.738	498.055	416.927	259.68	112.372	32.7057	1042	790.061	1185.1	1013.36	728.165	344.814	743.922	706.399	677.668	502.383	288.236	130.55	806.866	758.952	704.275	403.547	178.332	61.8459	749.147	783.006	703.453	503.851	246.088	92.3314
21	3FCR-3M-F168Y	S	L	W	F	Y	L	L	Y	A	V	R	16718.4	11313.4	9964.65	4455.42	2444.24	1235.24	15287.7	13413.8	11160.6	6296.74	2413.43	1078.65	61324.9	51943.2	45039.9	29432.4	13177.2	7893.65	15162.6	14361.6	13389.9	10029.3	5830.27	2789.51	16823.5	15113.1	12685.6	6570.17	2526.99	984.763	32025.6	29455.3	26016.2	11935.6	6466.63	2887.36
22	3FCR-3M-F168C	S	L	W	F	Y	L	L	C	A	V	R	5310.12	5111.45	2327.14	1204.16	599.227	162.733	5286.84	5083.14	4813.64	1906.63	895.791	360.557	2223.72	3619.11	4773.28	4563.91	2228.93	1027.61	4960.72	4747.94	2169.63	1421.36	1047.89	408.919	4540.63	3922.21	1243.72	921.809	572.567	200.144	4393.36	4650.46	1967.09	1376.37	883.639	377.367
23	3FCR-3M-F168M	S	L	W	F	Y	L	L	M	A	V	R	4288.72	4079.61	4446.5	1156.74	644.897	220.914	3257.2	3228.7	3108.77	2017.74	915.961	290.059	1213.61	1940	3047.57	2783.49	1837.87	1065.64	2474.89	2982.72	2589.74	1268.67	958.013	528.968	4510.95	4239.91	4161.25	885.448	393.312	167.194	1765.21	2300.77	4074.5	1768.5	885.242	555.113
24	3FCR-3M-T231G	S	L	W	F	Y	L	L	F	G	V	R	5158.23	8387.83	9022.67	1176.64	453.671	192.451	7012.15	5940.79	7999.9	5438.34	873.01	301.028	10101.4	12172.2	16846.9	9792.83	6747.71	642.158	3708.07	6886.71	5029.71	7917.48	1367.09	614.749	6415.61	7161.98	5067.74	710.397	290.241	110.782	12024.4	11619.5	18316.2	7728.16	3441.99	843.945
25	3FCR-3M-V261T	S	L	W	F	Y	L	L	F	A	T	R	141.741	674.368	842.166	284.862	198.248	69.9422	127.357	736.135	510.548	466.809	233.899	84.5933	136.043	479.783	244.992	502.941	766.736	452.775	101.878	580.236	659.472	419.695	323.152	215.504	137.146	589.755	553.465	398.092	190.707	86.8448	122.022	2586.92	1293.71	799.872	431.244	247.443
26	3FCR-3M-V261A	S	L	W	F	Y	L	L	F	A	A	R	1335.4	1101.45	1176.86	528.198	316.922	98.823	831.224	421.769	266.421	237.033	93.5841	20.0743	9239.65	4105.82	2211.31	1422.32	919.846	546.55	1738.93	1721.07	1288.91	938.385	515.049	267.848	630.287	534.403	403.859	194.315	74.0576	25.028	2327.27	1738.32	1213.83	567.139	289.102	150.186
27	3FCR-3M-R420K	S	L	W	F	Y	L	L	F	A	V	K	1741.12	2275.74	2083.17	968.413	561.107	324.846	1678.76	1730.12	1555.18	817.261	505.874	138.295	2258.61	3073.21	3320.2	2161.38	2283.92	1109.6	1283.12	1758.14	2012.77	1136.24	1111.19	711.072	2053.84	2204.45	2302.31	1288.41	608.554	459.649	1893.92	2100.6	2215.9	1599.07	1100.04	483.49
28	3FCR-3M-L58M-W59C	S	M	C	F	Y	L	L	F	A	V	R	3403.09	7858.12	5609.81	4855.17	838.515	487.448	2961.74	5734.89	4519.36	2625.3	341.516	235.252	4770.79	6571.23	5897.58	7529.44	1346.41	977.111	2678.33	4138.28	3852.95	4935.63	905.274	699.178	3702.78	4260.09	4787.16	4005.37	734.198	557.344	4646.55	5618.99	6590.49	3839.38	558.696	392.828
29	3FCR-3M-L58M-R420K	S	M	W	F	Y	L	L	F	A	V	K	4456.02	5052.96	5215.79	2993.49	578.95	271.398	1872.97	2740.77	2113.25	1490.59	294.584	157.484	2456.82	6575.84	5295.69	6533.32	1926.29	1224.16	1686.68	4727.03	4407.15	4121.89	574.142	421.136	4189.62	4760.81	4523.38	2391.59	459.56	250.794	1961.44	2984.7	4206.49	3338.53	819.734	487.755
30	3FCR-3M-L58M-F168Y	S	M	W	F	Y	L	L	Y	A	V	R	11373.7	9697.44	7878.42	3865.2	662.999	355.31	8160.91	7428.94	6249.02	3557.7	545.079	244.381	8174.19	17538.5	22030.7	17116	12248.4	6713.47	11357.3	10610.9	9916.34	8443.46	746.759	485.867	9472.59	8434.06	6498.31	3448.84	568.87	253.926	11232.4	11783.4	10938.5	7319.53	4179.27	627.006
31	3FCR-3M-W59C-F168Y	S	L	C	F	Y	L	L	Y	A	V	R	7012.56	7875.94	7176.71	6143.39	1354.91	852.013	3541.72	5120.35	4291.17	3245.94	468.949	270.899	4255.32	4977.22	4006.52	6217.29	7019.79	6428.93	3072.76	4360.62	4974.61	7271.24	1305.26	910.935	4152.14	4477.62	4630.87	4577.23	997.356	797.214	4422.65	4530.03	5643.93	5397.2	1020.53	685.293
entry	variants	the key residues											the errors of specific activities (mU/mg)
													1a						1b						1c						1d						1e						1f
		19	58	59	87	152	165	167	168	231	261	420	pH = 9.0	pH = 8.5	pH = 8.0	pH = 7.5	pH = 7.0	pH = 6.5	pH = 9.0	pH = 8.5	pH = 8.0	pH = 7.5	pH = 7.0	pH = 6.5	pH = 9.0	pH = 8.5	pH = 8.0	pH = 7.5	pH = 7.0	pH = 6.5	pH = 9.0	pH = 8.5	pH = 8.0	pH = 7.5	pH = 7.0	pH = 6.5	pH = 9.0	pH = 8.5	pH = 8.0	pH = 7.5	pH = 7.0	pH = 6.5	pH = 9.0	pH = 8.5	pH = 8.0	pH = 7.5	pH = 7.0	pH = 6.5
1	3FCR-3M	S	L	W	F	Y	L	L	F	A	V	R	947.159	184.742	583.852	22.0785	33.3839	20.2196	212.632	730.035	154.894	88.7032	46.0046	14.5695	259.903	881.169	695.677	203.877	218.857	95.4948	370.88	127.688	323.883	42.4777	35.813	40.8058	854.125	1173.33	665.485	62.3302	53.9348	30.9369	300.169	80.7043	45.8143	239.824	51.8217	36.3512
2	3FCR-3M-S19I	I	L	W	F	Y	L	L	F	A	V	R	46.226	1.623	49.6839	20.4788	13.3717	1.71832	186.377	547.625	32.5826	27.1767	39.2966	0.178477	246.605	372.588	1946.28	196.917	77.4686	31.6581	24.86	72.1755	71.3413	30.4477	14.6832	16.5026	137.283	96.3218	106.995	52.9622	4.83682	0.848147	873.439	504.055	499.81	132.054	68.6641	11.7844
3	3FCR-3M-S19H	H	L	W	F	Y	L	L	F	A	V	R	63.9286	36.9808	3.52581	1.36398	7.96516	4.86535	22.2383	26.5091	29.3864	15.863	16.5955	5.22344	770.494	1924	747.407	52.6673	28.4447	44.2659	25.2233	28.1912	62.7832	12.7733	18.5924	11.3128	49.8432	9.96338	49.4092	24.4157	4.96872	2.84731	499.851	304.564	383.979	18.4618	26.8744	6.35223
4	3FCR-3M-L58M	S	M	W	F	Y	L	L	F	A	V	R	535.557	503.699	408.617	402	56.8954	2.72968	380.806	543.997	394.793	309.595	108.674	1.61003	153.234	453.497	55.8393	171.412	244.065	49.7319	145.004	221.111	447.041	632.083	23.0745	171.923	329.218	294.548	265.388	148.662	17.5853	18.4533	339.529	238.988	300.7	352.088	5.87053	64.684
5	3FCR-3M-L58I	S	I	W	F	Y	L	L	F	A	V	R	107.145	59.5283	20.6832	9.94697	10.3854	3.17279	20.9346	8.26207	11.8272	1.84867	2.95814	1.44842	583.43	493.304	903.465	458.944	171.028	43.9999	14.0592	93.9047	88.0208	8.62971	9.98284	9.96115	11.6098	101.162	53.114	13.3196	16.659	6.24304	740.632	514.663	59.271	27.0576	38.5196	17.9539
6	3FCR-3M-L58K	S	K	W	F	Y	L	L	F	A	V	R	1.18918	0.000381	0.57328	3.79491	2.42156	3.38035	1.70766	1.22577	1.23017	0.786586	1.40835	0.624692	5.45483	3.03319	1.84716	2.25574	1.81952	2.78544	7.43723	4.62848	0.999831	1.44073	0.292395	0.001978	2.66386	1.85674	0.967666	0.989807	0.404097	0.315879	4.85116	2.58311	2.63595	3.71654	0.513289	1.10814
7	3FCR-3M-W59L	S	L	L	F	Y	L	L	F	A	V	R	616.32	4.40006	274.284	167.939	10.736	12.9058	127.65	147.419	48.253	16.8225	6.04973	5.59611	206.45	438.075	54.1542	128.883	133.26	15.1342	31.2973	60.2978	94.1117	21.2914	19.2018	9.67524	182.606	100.835	9.61779	23.9738	0.552571	30.9557	136.638	312.295	137.662	142.536	74.5627	23.3749
8	3FCR-3M-W59C	S	L	C	F	Y	L	L	F	A	V	R	227.374	54.5314	339.517	120.723	71.0576	90.2068	202.381	354.994	282.896	42.2348	11.0166	26.3732	455.003	479.298	306.721	81.43	340.031	62.1886	166.042	43.2474	109.552	48.4153	91.4147	37.474	126.078	41.8816	322.823	206.148	58.2037	53.8888	222.957	54.5676	244.742	82.6044	8.91246	24.9233
9	3FCR-3M-W59F	S	L	F	F	Y	L	L	F	A	V	R	37.1413	88.3183	187.778	44.3142	19.1982	16.4309	112.728	216.506	131.692	7.47565	9.58128	5.21401	147.737	297.015	227.258	631.487	34.0552	28.3289	360.462	477.911	109.799	61.0188	20.4669	21.4641	157.438	261.311	175.909	5.33442	10.6592	12.1287	202.2	109.566	205.13	10.4683	9.67592	12.4309
10	3FCR-3M-W59Y	S	L	Y	F	Y	L	L	F	A	V	R	24.5362	22.6958	13.9071	4.63567	2.27953	0.54669	9.91259	4.78741	13.998	2.05046	1.3749	0.383235	464.75	299.087	45.0889	17.6912	11.0408	10.0002	56.9139	64.7516	68.6426	13.0794	13.2193	13.8524	8.57168	9.02269	19.6759	1.77875	0.919088	0.823938	32.7919	14.0006	26.44	0.303306	2.49389	0.871222
11	3FCR-3M-F87Y	S	L	W	Y	Y	L	L	F	A	V	R	274.545	808.661	1000.66	84.4106	11.5076	20.508	50.7673	60.5703	0.959709	10.8693	4.41138	1.20153	114.865	3004.65	1731.6	1650.16	1866.64	324.596	576.053	1047.03	6.37814	76.5087	83.7868	8.44256	34.745	300.185	252.728	23.148	32.9565	27.4083	556.207	591.84	72.7524	294.891	96.0349	42.8841
12	3FCR-3M-Y152N	S	L	W	F	N	L	L	F	A	V	R	43.7699	18.842	65.5945	5.81286	5.35011	4.09549	7.14142	21.8956	21.7381	29.2463	3.15465	3.26483	51.2979	69.8658	73.9466	33.1411	26.8419	6.54937	40.7636	38.8772	54.7364	18.9758	14.0242	15.3584	17.7422	38.1363	45.5704	12.9611	16.9614	7.38704	25.9824	94.8127	84.9295	21.9534	15.0431	13.2327
13	3FCR-3M-Y152F	S	L	W	F	F	L	L	F	A	V	R	69.6972	193.556	69.3745	8.80146	3.35848	1.05348	304.854	307.383	48.4378	30.963	3.18339	6.03873	420.775	67.0057	123.674	198.728	166.719	35.2521	125.569	90.6688	30.8883	8.66036	10.7307	14.7505	368.565	118.171	121.32	15.237	8.68514	6.93441	313.515	252.962	111.108	18.5489	17.0726	11.192
14	3FCR-3M-Y152H	S	L	W	F	H	L	L	F	A	V	R	32.5349	13.948	35.1456	4.49696	3.14073	3.11997	15.4007	15.3605	42.8933	5.58224	0.54306	1.67792	99.4575	124.521	38.9853	28.9289	36.1183	29.0089	2.84108	35.8896	51.6622	3.52047	18.7675	10.842	24.9698	6.3827	49.2192	16.8535	8.1788	7.0251	85.2252	43.089	95.1779	7.14545	17.1069	7.0531
15	3FCR-3M-L165K	S	L	W	F	Y	K	L	F	A	V	R	0.094668	0.641597	0.641307	0.355024	2.94497	0.10819	0.415128	0.292642	0.158624	1.32755	0.631314	1.44799	1.40655	1.046	2.48623	2.32937	0.916182	1.1726	5.10315	3.27369	6.98614	6.85996	3.71301	0.384727	0.414047	0.101759	0.068279	0.055229	0.76763	1.12824	2.23918	0.515186	1.38256	1.04778	3.00032	2.51848
16	3FCR-3M-L165E	S	L	W	F	Y	E	L	F	A	V	R	0.081336	0.975823	0.363633	2.50492	1.48532	0.671029	0.470042	1.73372	0.452437	2.63148	2.41219	1.0619	2.48513	1.28046	0.310052	0.718248	2.36586	0.929183	4.11538	2.44608	1.30494	5.7973	5.53489	2.98925	0.99874	0.601769	0.221941	3.05892	0.59884	1.08593	0.232447	2.5186	0.782227	2.30864	2.57933	2.01881
17	3FCR-3M-L167H	S	L	W	F	Y	L	H	F	A	V	R	81.1028	117.259	75.6225	12.5915	25.9942	8.47483	73.1067	102.116	146.308	24.1474	23.869	11.9895	260.579	364.209	770.759	59.1407	39.798	67.1662	126.176	66.0953	215.307	41.2749	12.8272	19.3834	124.025	73.3115	126.438	35.5125	13.0153	13.9802	151.7	298.046	49.3153	46.3128	41.0641	18.2383
18	3FCR-3M-L167F	S	L	W	F	Y	L	F	F	A	V	R	124.435	97.0035	12.5326	17.7434	11.9393	5.26474	180.761	64.2098	100.741	28.3181	14.098	6.36349	160.685	246.796	509.441	109.485	95.9308	70.2042	13.6698	0.718913	88.5952	74.8995	27.0215	28.5942	97.9731	40.3586	106.324	44.4884	6.09115	7.15836	418.036	145.051	144.943	40.7152	23.0144	26.4433
19	3FCR-3M-L167Y	S	L	W	F	Y	L	Y	F	A	V	R	37.0512	26.3597	14.1235	5.80639	8.028	0.207103	74.9367	58.3027	110.1	8.23543	17.4512	4.37691	2107.81	91.34	1802.7	975.749	58.6709	29.4526	175.631	143.943	165.979	101.149	29.6161	26.0165	135.706	90.3217	24.8865	35.4093	17.0983	9.85227	211.668	65.2327	78.2829	55.766	26.6301	8.14563
20	3FCR-3M-F168H	S	L	W	F	Y	L	L	H	A	V	R	27.2599	33.2187	16.2612	5.05954	7.48011	1.94172	39.9689	2.98546	27.0657	16.6042	7.4168	2.16795	95.1851	36.1642	99.4379	76.7048	35.4488	22.7983	13.4179	22.7659	7.86466	8.74695	9.71675	7.21147	46.321	33.0336	43.2285	6.76291	9.69028	5.29187	41.7043	24.8187	43.2998	9.27676	7.19498	0.300844
21	3FCR-3M-F168Y	S	L	W	F	Y	L	L	Y	A	V	R	226.421	570.288	343.27	142.585	218.267	41.0971	513.82	370.931	433.345	178.783	32.3962	38.3081	3076.76	2454.5	1357.12	2086.72	387.788	125.973	41.5	234.793	336.053	180.589	127.355	74.6133	586.168	403.546	245.339	259.804	40.507	36.9389	1264.75	1287.63	322.885	236.281	236.281	115.63
22	3FCR-3M-F168C	S	L	W	F	Y	L	L	C	A	V	R	0.65644	126.372	229.959	42.7952	24.1465	7.45462	2.7969	94.3665	89.5305	18.8677	44.8054	23.7672	198.32	250.263	411.13	271.833	129.984	87.8008	27.8903	101.956	154.464	67.8382	61.087	23.5116	96.4052	111.41	53.5775	21.0444	29.2747	15.9618	215.417	110.406	152.741	11.477	25.2433	25.4654
23	3FCR-3M-F168M	S	L	W	F	Y	L	L	M	A	V	R	161.328	212.57	48.1466	113.004	39.7873	9.30047	144.554	111.376	96.1988	72.1786	35.3845	25.5305	109.666	120.28	60.6014	21.7859	13.8345	45.398	137.041	91.3238	84.7605	25.8003	15.5948	29.6635	113.666	95.7143	259.43	44.2824	12.7123	7.11082	157.605	163.219	161.456	97.2283	43.9429	38.2616
24	3FCR-3M-T231G	S	L	W	F	Y	L	L	F	G	V	R	211.465	301.965	707.103	65.6409	13.6815	12.4416	261.407	394.88	548.499	165.441	5.0248	17.5013	13.6854	544.279	932.557	733.767	330.387	55.18	22.21	625.888	390.857	661.972	123.837	27.7515	159.978	567.371	21.8417	16.8253	21.7845	7.84892	719.578	397.243	508.261	249.715	274.428	16.5113
25	3FCR-3M-V261T	S	L	W	F	Y	L	L	F	A	T	R	3.29102	40.9607	63.2078	10.0974	9.46648	5.01598	4.36048	35.2431	14.8048	30.6593	4.22241	7.62502	0.710689	16.9113	19.6051	8.3141	44.6862	28.4168	4.66232	13.025	9.33713	32.2489	10.9501	11.2848	5.93777	18.2555	34.7002	0.244486	10.7752	4.74607	7.3683	0.939278	124.338	49.204	24.4515	13.2861
26	3FCR-3M-V261A	S	L	W	F	Y	L	L	F	A	A	R	13.5709	28.9863	55.3208	2.70397	11.583	6.08697	8.12815	28.7914	8.00346	5.47215	3.32606	0.688982	832.191	36.8275	191.031	48.2782	25.1044	36.8939	102.484	57.4157	26.3375	32.3995	27.4624	6.45823	13.8249	41.4408	26.939	5.32174	2.45207	1.79652	59.1039	122.176	43.0243	28.2891	7.51824	11.2255
27	3FCR-3M-R420K	S	L	W	F	Y	L	L	F	A	V	K	29.0465	52.948	79.3861	37.2778	37.7155	8.2763	35.1909	34.3396	75.8004	51.6591	14.7354	5.74251	68.351	173.351	128.869	181.822	70.6439	22.2428	48.7769	68.4368	77.2736	76.468	22.0044	25.3702	45.9838	64.863	89.3916	56.7764	36.2822	1.06482	56.8177	42.7122	45.8151	6.84754	66.5085	8.87663
28	3FCR-3M-L58M-W59C	S	M	C	F	Y	L	L	F	A	V	R	183.543	434.51	462.917	382.659	26.3327	23.8084	16.8507	95.1425	111.791	146.391	2.46892	7.71503	37.1221	91.5828	148.102	426.882	51.7867	40.044	64.8798	37.2565	124.736	165.465	84.1479	10.0342	267.056	293.286	191.447	227.012	9.92389	19.9565	66.9139	112.087	498.743	126.667	11.2256	29.0603
29	3FCR-3M-L58M-R420K	S	M	W	F	Y	L	L	F	A	V	K	273.325	292.865	254.119	245.02	23.3759	6.23618	18.6252	20.181	127.299	3.00982	1.7582	6.16456	184.702	540.711	361.082	222.119	18.1296	38.9802	30.3702	51.1166	39.1613	244.548	7.94098	14.5464	184.801	67.4818	127.893	56.9787	10.7932	12.1868	68.9152	176.744	376.005	98.1305	12.928	26.2194
30	3FCR-3M-L58M-F168Y	S	M	W	F	Y	L	L	Y	A	V	R	631.658	324.785	336.207	193.042	37.6451	13.2598	231.875	196.336	128.577	56.1261	4.22088	3.05593	72.3296	665.981	451.2	910.171	439.966	152.184	204.099	528.006	590.496	439.968	28.8473	12.6994	148.207	312.298	184.443	201	11.4547	5.13624	106.703	210.099	203.212	220.875	182.547	10.0779
31	3FCR-3M-W59C-F168Y	S	L	C	F	Y	L	L	Y	A	V	R	492.049	363.846	423.464	28.1619	38.0689	19.7678	221.781	193.875	328.176	169.91	22.5602	10.6612	126.974	90.4611	287.207	216.612	238.175	381.364	222.973	316.601	378.95	637.181	118.068	9.91652	71.9186	132.815	43.3834	64.2943	17.1326	16.3267	276.184	51.2469	90.5183	219.087	61.3944	32.5017
